# Supplementary material
Source: ML conference proceedings conference paper supplement (https://www.ecva.net/papers/eccv_2020/papers_ECCV/html/123540018_ECCV_2020_paper.php)
Supplement: Supplementary file 1 [file 123540018-supp.pdf]

# Supplementary Material

## 1 More Qualitative Results

Figure 1 shows more qualitative results on the KITTI validation split set. The ground-truth 3D boxes and the predicted 3D boxes of the baseline method and our DA-3Ddet are drawn in green, yellow, and red, respectively. As observed, our method can produce high-quality 3D bounding boxes in different types of scenes.

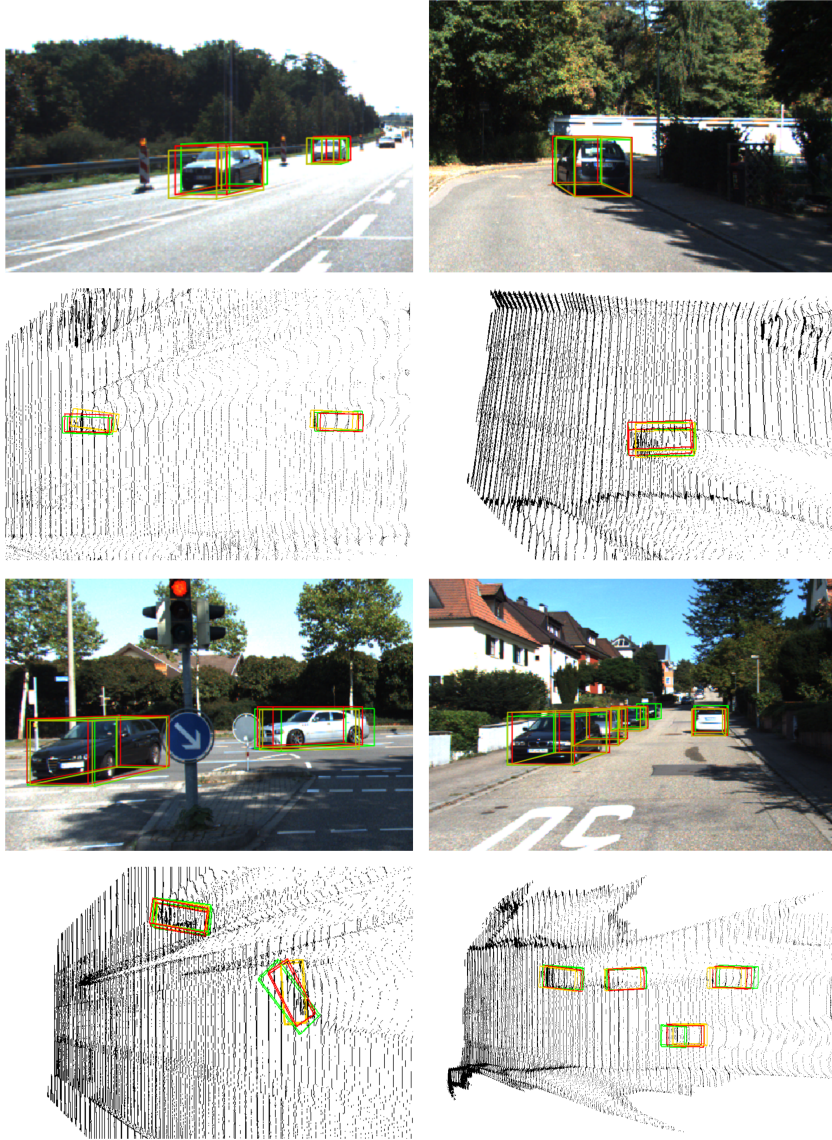

Figure 1: Visualization of the results on the KITTI validation split set. The ground-truth 3D boxes and the predicted 3D boxes of the baseline method and our method are drawn in green, yellow, and red, respectively.
